# Supplementary material
Source: publisher figshare collection journal article supplement (https://karger.figshare.com/ndownloader/files/37411993)
Supplement: Supplementary file 1 [file 37411993]

**Supplement Table 2:**Risk of bias assessment for included studies applying the Newcastle-Ottawa Scale.

| **Author** | **Selection** | | | | **Comparability** | **Exposure** | | | **Total** |
| --- | --- | --- | --- | --- | --- | --- | --- | --- | --- |
| **Cohort studies** | *Representativeness of the exposed cohort* | *Selection of the non-exposed cohort* | *Ascertainment of exposure* | *Outcome of interest was not present at start of the study* | *Comparability of cohorts on the basis of the design or analysis* | *Assessment of outcome* | *Follow-up was long enough for the outcomes to occur* | *Adequacy of follow-up of cohorts* |  |
| *Baldin et al. [25]* | * | * |  | * | ** | * | * |  | 7/9 |
| *Goldacre et al. [28]* | * | * | * | * | ** | * | * |  | 8/9 |
| **Case-control studies** | *Adequate case definition* | *Represen-tativeness of the cases* | *Selection of controls* | *Definition of controls* | *Comparability of cohorts on the basis of the design or analysis* | *Ascertainment of exposure* | *Same method of ascertainment for cases and controls* | *Non-response rate* |  |
| *Abbasi et al. [22]* | * | * |  | * | ** |  | * |  | 6/9 |
| *Al Wutayd et al. [23]* |  | * |  | * | ** |  | * |  | 5/9 |
| *Alkhawajah et al. [24]* | * | * |  | * | ** |  | * |  | 6/9 |
| *Brenton et al. [21]* | * | * |  | * | ** |  | * |  | 6/9 |
| *Conradi et al. [26]* | * | * | * | * | ** |  | * |  | 7/9 |
| *Da Silva et al. [27]* | * | * | * | * | ** |  | * |  | 7/9 |
| *Graves et al. [20]* | * | * |  | * | ** |  | * |  | 6/9 |
| *Hedström et al. [19] (Sweden)* | * | * | * |  | ** |  | * |  | 6/9 |
| *Hedström et al. [19] (USA)* | * | * | * |  | ** |  | * |  | 6/9 |
| *Hughes et al. [29]* | * | * | * |  | ** |  | * |  | 6/9 |
| *Pisacane et al. [30]* | * | * |  |  | ** | * | * |  | 6/9 |
| *Ragnedda et al. [18] (Italy)* | * | * | * |  | ** |  | * |  | 6/9 |
| *Ragnedda et al. [18] (Norway)* | * | * | * |  | ** |  | * |  | 6/9 |
| *Spencely & Dick [31]* | * | * | * |  |  |  | * |  | 4/9 |
| *Tarrats et al. [32]* | * | * |  | * |  |  | * |  | 4/9 |
